# Supplementary material for: High Fidelity Patient-Derived Xenografts for Accelerating Prostate Cancer Discovery and Drug Development
Source: Oxford University Press journal article supplement (doi:10.1158/0008-5472.can-13-2921-t), 2013-12-19
Supplement: 00085472can132921t-sup-tab1.xlsx [file 00085472can132921t-sup-tab1.xlsx]

## Sheet: Table S1
Supplemental Table 1: Growth inhibition of transplantable tumor lines after Bicalutamide treatment
Tumor line ID	Group	Tumor volume (mm3, Mean±SE)	GI**	p value
LTL313B	Control	387.08±46.86
	Bicalutamide*	170.15±24.42	0.5604	0.001
LTL313H	Control	508.98±82.19
	Bicalutamide*	263.44±47.19	0.4824	0.03
LTL331	Control	574.42±42.2
	Bicalutamide*	311.61±35.02	0.4575	<0.001
LTL311	Control	746.96±189.72
	Bicalutamide*	345.17±51.57	0.5379	0.09
LTL412	Control	258.49±55.66
	Bicalutamide*	89.15±17.29	0.6552	0.019
LTL418	Control	372.11±37.97
	Bicalutamide*	177.81±32.53	0.5222	0.001
*Bicalutamide was dosed p.o. 10mg/kg, day 1-5/week for four weeks, except LTL311, which was treated for 3 weeks.
**Growth inhibition (GI) was calculated as the percentage decrease of tumor volume compared with the control.
