# Supplementary material for: High Fidelity Patient-Derived Xenografts for Accelerating Prostate Cancer Discovery and Drug Development
Source: Oxford University Press journal article supplement (doi:10.1158/0008-5472.can-13-2921-t), 2013-12-19
Supplement: 00085472can132921t-sup-tab2.xlsx [file 00085472can132921t-sup-tab2.xlsx]

## Sheet: Table S2
Table S2: Gene expression signature associated with predisposition to neuroendocrine transdifferentiation derived from LTL331. Genes whose expression levels showed the identical trend in three different comparisons are provided.
gene_name	331/AdCa xenograft median	331R/331	NEPC/AdCa
ACAA2	2.61996	2.14584	3.38084
ADAM22	2.78349	2.00482	2.25124
ADAMTS14	5.22604	942.043	5.93173
ADAMTS18	2.36556	2.28194	7.86767
ADCYAP1	2.96858	60.8794	42.0267
ADORA1	2.26222	13.3699	32.0429
ADRA2C	3.58743	4.49609	3.50661
AGAP2	4.08973	2.40402	3.79556
AGBL4	2.22512	3.75935	8.29167
AIM1L	5.02811	6.27358	5.22453
AK7	3.52961	6.545	2.64595
AMDHD1	8.05261	2.21349	2.31758
ANKRD36	3.40616	2.63648	2.49417
ANP32E	2.42386	2.1817	4.4047
AP3B2	11.3887	3.116	17.1538
APLP1	2.5419	8.63135	138.641
ARHGAP11B	2.56389	2.78258	5.2631
ASAP1	2.4604	4.20779	2.39993
ASTN1	2.09407	65.5793	2.29676
ASXL3	2.63726	57.8616	37.0467
ATAD5	2.20302	2.53189	8.14423
ATP1A3	3.28936	4.48226	215.34
AZI1	2.70708	2.00444	3.37958
BEGAIN	2.16817	2.87289	4.87062
BEND5	8.06863	4.59448	3.62394
BIRC5	2.27404	2.38431	10.5497
BRSK1	2.68105	7.66484	4.22588
BSN	2.93451	3.44336	15.3977
C10orf140	4.56857	3.10678	2.92519
C12orf39	2.37848	3.56124	8.51767
C12orf42	5.99556	2.03266	7.39101
C12orf56	10.6301	3.92993	7.0128
C19orf55	2.30228	2.24633	2.74409
C19orf57	4.73286	2.35298	10.7345
C2orf70	7.3198	10.2455	7.88709
C4orf21	3.75733	2.00186	3.09801
C6orf118	10.8833	3.89841	2.46818
C6orf126	8.21356	6.28993	7.24789
C6orf138	3.02827	2.91408	12.2431
C6orf174	8.57263	61.8854	11.6233
C9orf100	2.32339	2.21402	4.71262
C9orf40	3.82611	2.84058	4.79465
CA10	4.47396	99.1042	16.4018
CA8	4.07761	24.5779	10.584
CA9	3.75898	24.6675	606.12
CACNA1A	2.41665	22.0329	272.496
CAMP	2.91333	3.11355	10.2476
CASC5	2.19149	4.39025	13.5578
CCDC150	6.69222	2.93284	13.3101
CCDC151	4.32752	4.11074	10.9459
CCDC19	2.33334	16.459	5.81962
CDC7	4.53196	2.23808	8.79797
CDCA2	2.33083	3.01767	19.8449
CDKN2A	3.20038	2.17368	66.092
CDKN2C	2.34518	4.4156	15.4665
CELSR3	7.39846	6.4513	6.27387
CEP78	2.71811	2.73591	3.67857
CGA	5.53235	286.903	13.2009
CHRNA3	2.55676	55.9594	29.67
CHRNB2	28.1575	18.0651	182.106
CHST8	8.34332	6.88487	13.8093
CIB2	11.6494	5.93707	2.64286
CPT1C	17.3598	3.76558	4.47376
CRABP1	2.28802	142.501	13.6569
CRIP1	2.51068	6.61462	18.7569
CSPG4	3.85771	4.29126	3.4153
CTHRC1	5.85728	4.31946	8.71014
DCLK1	8.60269	4.94951	3.9964
DENND2A	3.95984	7.74134	2.39409
DLL3	8.16634	8.57875	335.8
DLX4	3.15175	4.81594	5.86667
DMBX1	5.04004	2.54211	24.2772
DNAI1	7.90619	3.09415	5.14117
DNAI2	6.60777	23.6032	3.57895
DNAJC12	6.09837	2.86673	3.96299
DNAJC6	2.10057	17.9531	6.37307
DNAJC9	3.54354	2.33529	2.86551
DOK6	38.3341	2.26306	2.44039
DPYSL2	19.5803	4.73173	3.92447
DPYSL3	3.01006	5.79596	3.59619
DPYSL5	52.6588	2.24128	217.831
DSCAML1	4.45371	222.635	37.5763
DTX1	32.1733	2.97616	6.7684
E2F2	2.83713	3.10014	41.7047
EFNB1	2.03961	6.65341	2.21428
EFNB3	7.20306	4.53026	5.84643
EID2B	2.82905	2.41279	3.15232
ELF4	2.44662	2.61976	9.85782
ELMO1	2.36461	28.0701	3.44718
ESPL1	2.4215	2.96486	39.1916
FAM123C	8.29753	11.7112	46.8532
FAM161A	2.49548	3.55809	3.78903
FAM176A	4.19195	5.78984	8.17915
FAM184A	3.34273	2.28408	2.62289
FAM46A	5.05758	2.72683	10.5168
FANCA	2.42699	4.083	3.27217
FBXO43	5.82478	5.81836	11.673
FHAD1	4.74722	7.01918	5.0374
FOXD2	2.13314	2.37836	2.15102
FOXN4	2.9101	14.0455	2.72671
FRMD3	3.3085	62.7437	6.179
FRMD5	7.04671	3.47646	10.3931
FYN	2.28164	26.57	4.11424
GABBR2	6.1274	233.843	16.3265
GALNT14	2.07383	3.49079	2.14461
GFI1	3.24292	70.0626	7.94215
GGH	33.9269	3.15102	18.4257
GJC1	2.21063	70.0272	4.65195
GOLGA7B	2.08415	4.24654	23.0023
GPC2	2.609	2.03892	6.51034
GPR153	2.88977	6.28759	2.85952
GPRIN1	5.26819	3.99563	42.1952
GRIN2D	2.21387	11.3299	3.37382
GRM8	62.7573	5.00823	22.0304
GRP	2.20422	45.1888	2.36052
HCN4	3.0059	10.4654	8.77603
HES6	2.62691	19.2944	14.9397
HMGN3	3.32751	2.02546	3.35343
HOXB4	3.13011	2.68052	11.3818
HOXD3	8.48215	5.9502	4.68383
HPSE	3.01485	2.94849	5.02768
IFI27L2	8.46601	40.7623	2.10943
IGFBPL1	3.50293	3.81016	28.0965
INA	9.17271	4.8729	178.449
JAKMIP2	5.29744	23.3449	46.1591
KCNH6	6.7786	9.56087	2.73609
KCNH7	2.05103	3.40011	5.80396
KCNMB2	2.54365	251.495	7.71057
KIAA0319	4.99962	7.44104	30.6338
KIAA0408	12.7338	82.6805	11.055
KIAA2022	13.1349	5.49426	2.19398
KIF19	7.77072	228.309	10.5087
KIT	3.03576	49.9141	3.17298
KLHL32	3.54978	23.3732	3.38324
KPNA2	2.02147	2.9843	7.78489
LAMB1	7.91046	3.19309	4.05766
LEFTY1	2.92659	4.6997	7.22948
LMO3	2.25068	112.152	2.0327
LPL	2.91195	6.30928	9.39893
LRRC8C	2.93303	32.5374	2.29156
LRTM2	2.97676	44.7415	66.6469
LZTS1	7.89415	10.7141	5.6239
MAP1A	2.42624	4.17961	3.73089
MAPRE2	2.68516	3.5079	4.45147
MAST1	2.34672	6.02129	69.4739
MAT1A	3.18373	8.10771	4.54656
MCAM	2.36592	17.7288	2.38347
MEST	2.51661	2.4831	4.14652
MST1R	3.57868	2.11808	23.1049
MUC1	8.52304	2.46189	6.69932
MYBL1	2.67358	5.02434	4.72889
MYBL2	2.74998	3.81829	37.9133
MYCN	12.8187	3.21752	8.89441
MYO7A	5.79911	4.48327	7.12114
MYT1	16.52	4.30733	245.719
NCAM1	8.24834	3.2794	14.686
NDUFA4L2	3.13274	6.77887	23.001
NEFL	26.172	2.04454	3.29567
NFASC	4.47996	4.75615	4.93398
NKD2	2.98489	2.88578	2.08978
NMU	4.5834	5.66107	13.5706
NOTCH4	11.2913	3.98211	2.25108
NPTX1	2.35137	60.2893	132.627
NPTX2	14.3458	9.26596	9.13314
NRCAM	2.4444	5.94903	8.55636
NRM	2.00342	3.34724	13.1628
OLFM1	2.65793	33.4419	5.15426
OLIG1	5.9037	73.5831	18.2719
OSBPL6	2.35822	2.99544	2.11258
PAX2	8.66363	62.6025	3.15194
PCBP3	4.54741	5.40432	16.9852
PCDHA2	2.4499	6.64457	2.18435
PCDHB9	2.51003	2.87212	5.36128
PDZD4	2.52713	3.66826	6.67224
PGBD5	2.62784	8.69626	19.412
PGF	6.61881	9.94553	3.51175
PLAUR	6.52222	2.15049	2.14662
PLCD4	3.16299	13.6955	2.12243
PLCL2	2.04591	21.6364	3.39802
PLEKHG4	3.67413	3.48014	4.66931
PLEKHH2	11.796	4.35442	3.02809
CACNA2D3	2.04825	4.34568	2.14736
PLS1	3.49772	7.35056	5.22377
PLXNA2	2.72095	3.72254	5.38827
PLXNC1	3.70255	2.0503	2.37118
PNMA2	16.1768	3.00331	6.97274
PNMAL1	333.138	6.40313	2.7983
PPM1D	3.15649	2.41782	2.41405
CAMK1D	2.09217	3.94162	10.8899
PROCA1	2.43413	2.56493	4.77448
PROX1	6.97832	21.3985	104.883
PSD2	2.29171	2.74314	7.42191
PSIP1	2.37047	2.97578	3.94888
RAB33A	2.33308	8.33593	2.5931
RAB3C	5.32598	2.0061	39.8403
RBBP8	2.44419	3.51186	5.02055
REEP2	3.0044	4.91304	3.20877
RHEBL1	2.08935	11.4989	11.8435
RIBC2	2.23643	15.4551	7.48319
RNFT2	2.56888	3.66116	9.86031
RPS6KL1	2.63008	3.45104	12.6099
SCG3	2.37615	25.8886	174.14
SCGB2A1	2.1696	15.662	8.62348
SCN8A	2.30856	2.14614	8.26669
SEMA5B	2.38977	4.79546	7.78436
SGCE	3.42687	236.257	4.62238
SH3GL2	6.41896	10.0189	13.0077
SIX2	3.24311	3.61242	66.7441
SLC8A2	7.99593	27.2864	3.27793
SLFN13	223.079	3.21872	6.50171
SNAP25	6.59434	7.03179	20.0112
SOX11	20.7495	131.33	16.6285
SPC24	2.42591	2.13371	12.9436
SPEF1	2.30057	5.7246	2.06654
SRGAP1	2.63348	4.26395	4.00787
STOX1	4.15914	6.18907	2.30126
STX2	3.02738	2.22019	2.44998
SULT4A1	5.51663	5.99682	31.4642
SYN1	2.82098	3.43059	32.1755
SYN2	11.0419	7.63382	15.6612
SYNPO2L	5.56115	4.17034	2.96206
SYT1	3.71408	15.154	37.0718
TACC3	2.54761	2.15562	9.5594
TEKT2	25.6149	8.17436	7.75187
TLE2	2.04081	3.07802	5.81488
TLE6	2.61183	2.82025	13.7018
TMEM132E	6.44135	4.10418	2.90592
TMOD2	2.09951	6.67498	2.58615
TMPRSS6	2.22156	5.6855	40.4722
TNFRSF25	5.20706	4.26319	14.6926
TNIK	2.12291	14.3461	3.55322
TNNI3	15.417	10.3249	85.0847
TNNT1	113.665	4.0916	404.666
TOX	10.4689	42.6961	17.2419
TRIM9	2.14358	7.24067	194
TUBB2B	2.84697	87.1793	39.0421
UHRF1	2.60938	2.22751	56.0023
UNC13A	10.219	4.10174	340.153
USP11	2.00606	2.24443	3.14229
WDR62	2.43457	3.50247	28.4603
WSCD1	4.66943	27.1843	22.3648
XKR7	2.37771	5.21025	90.5564
ZMYND10	2.21868	9.59099	2.36616
ZNF367	3.40854	2.53902	19.3111
ZWINT	2.22937	4.13396	11.6482
FGF11	2.03212	2.05428	4.13693
FMN2	2.22155	6.93811	10.3837
KIF5A	2.26686	3.91303	12.3696
MIAT	2.43489	402.022	23.6697
PAM	2.00025	4.0747	2.02707
REEP1	2.35315	3.51346	5.11607
SEMA5A	2.02857	24.5216	2.11909
SLC26A10	2.26246	2.18887	4.97762
TAGLN3	2.0191	67.176	101.621
ABAT	-2.34374	-39.4332	-6.40184
ABCB4	-2.04972	-4.9182	-2.05401
ABCC4	-22.893	-17.0628	-68.4113
ACADL	-2.35501	-26.5458	-9.21961
ACSM1	-4.5022	-138.432	-146.319
ACSM3	-2.08715	-10.7739	-4.68569
ACSS3	-3.78252	-5.89825	-4.82987
ADAM9	-3.17997	-2.91247	-2.71361
ADHFE1	-2.30613	-6.4812	-7.22248
ADRB1	-2.79055	-176.607	-36.3478
AGR2	-2.86308	-11.6994	-2.23326
AGTR1	-6.36917	-5.23606	-13.1759
ALDH2	-2.94344	-4.48026	-2.78931
ALOX15B	-16.3481	-7.65002	-222.533
ANGPT1	-2.92718	-2.69979	-6.83445
ANXA1	-2.68919	-7.13967	-2.8922
ARHGAP6	-2.0084	-55.7383	-9.10328
BAG3	-3.34293	-4.48593	-2.05477
BCAS1	-2.38219	-205.374	-164.448
BLNK	-4.13663	-70.1113	-10.8833
C10orf81	-3.68713	-16.881	-15.3465
C4orf32	-5.83942	-2.16384	-5.53854
C6orf105	-2.0118	-87.3809	-2.00734
C8orf4	-27.9017	-11.3658	-2.49111
CAMKK2	-13.5742	-6.7981	-8.36799
CCDC64B	-2.17677	-12.9337	-2.65137
CCL3	-4.5846	-2.49773	-4.34409
CCND1	-9.33798	-3.65106	-4.52527
CD302	-4.65288	-8.42757	-2.38797
CD9	-2.01745	-3.81687	-2.89919
CDK6	-8.52855	-2.47697	-6.51079
CDO1	-24.9827	-2.32629	-4.14963
CEACAM1	-2.08533	-3.01832	-3.51297
CGREF1	-4.66555	-2.74129	-2.94709
CLCF1	-2.33062	-2.52526	-2.70564
COBLL1	-2.34427	-2.54866	-2.55424
COL12A1	-2.66884	-19.5536	-2.19133
COMT	-2.55944	-3.95921	-2.38279
CORO1B	-2.02581	-2.36747	-3.02898
CPEB2	-2.92303	-2.30146	-3.08546
CRISP2	-148.273	-2.65446	-2.88948
CRISPLD1	-3.39495	-167.683	-5.59838
CRYL1	-3.40446	-7.04244	-3.68692
CRYM	-3.0011	-4.68125	-9.31585
CYP4F11	-2.17197	-29.6707	-2.54126
CYP4F12	-2.6969	-8.53056	-3.52526
CYP4F2	-2.72218	-9.14749	-2.13702
DNASE2B	-3.75559	-57.6642	-153.349
DPP4	-15.6083	-21.8065	-78.8453
DSC3	-2.03919	-2.92236	-9.76707
EDA	-3.95242	-3.18547	-2.95336
ELL2	-3.41227	-3.93129	-2.77454
ELOVL7	-2.42761	-3.68936	-2.82618
ENDOD1	-4.25311	-19.7376	-7.82885
ERBB3	-2.49153	-2.20904	-3.80713
FAM153A	-2.42778	-2.78035	-8.50245
FAM5C	-6.58909	-4.10028	-39.1091
FAS	-5.45665	-3.59052	-3.01384
FBP1	-4.79117	-171.192	-3.95885
FECH	-2.16368	-2.25613	-2.59907
FMO5	-5.06901	-6.06105	-7.63833
FOLH1	-2.12047	-1245.13	-130.633
GAL	-7.49065	-4.29324	-6.80778
GALM	-6.19744	-2.63287	-3.40609
GHR	-2.48484	-91.1702	-27.6934
GJB1	-4.61797	-14.5276	-2.13093
GLB1L2	-2.80758	-2.00498	-2.92837
GLYATL1	-8.3548	-71.738	-38.5007
GNG12	-2.09289	-36.687	-3.82972
GNG7	-2.16176	-3.94798	-4.9479
GOLM1	-5.76861	-10.8261	-4.06076
GPR160	-2.09795	-76.6673	-8.59619
GREB1	-3.49811	-50.1566	-13.2724
GREM2	-23.7132	-7.80294	-29.1818
GRTP1	-5.0286	-6.96504	-12.0907
GUCY1A3	-2.13156	-3.00538	-2.95498
HLA-DMB	-43.5014	-7.36801	-2.03036
HLA-DRB5	-2.04912	-7.59421	-2.5479
HOOK3	-2.41257	-2.30195	-3.0351
IKZF2	-3.07628	-6.16297	-2.52863
IL1R1	-2.42154	-66.489	-8.83784
IL1RAPL1	-4.43123	-2.3521	-3.06857
IMMP2L	-2.12197	-2.92898	-4.17887
ITM2B	-2.28202	-2.24796	-2.02613
KL	-9.35552	-2.13136	-8.06978
KLHL13	-2.28927	-5.72413	-2.02932
KLK15	-10.4162	-6.68021	-5.90782
LACTB	-2.64861	-2.42499	-2.54176
LATS2	-2.07347	-7.42917	-3.93789
LDHD	-2.43765	-11.9803	-43.0532
LGR4	-3.19523	-2.56476	-2.42862
LPHN2	-2.36807	-2.82762	-2.18143
LRRC26	-2.70701	-2.88179	-13.6986
LTF	-8.31829	-2.19608	-3.42667
LUZP2	-5.5981	-4.20524	-48.4949
LXN	-3.09168	-17.7145	-3.86925
MALT1	-5.49338	-3.14705	-5.29599
MESP1	-2.7149	-3.20491	-12.7185
MID2	-2.50832	-63.6464	-2.22382
MPP7	-2.28431	-10.6844	-6.52311
MUM1L1	-2.22095	-27.7023	-25.3027
NANS	-2.45934	-2.00291	-3.81276
NAP1L2	-2.27081	-112.24	-6.28098
NFIL3	-2.12534	-4.11595	-3.37994
NOSTRIN	-3.60765	-9.96225	-3.7069
NTN4	-4.86174	-2.54233	-2.27152
NTNG1	-2.02042	-2.33584	-2.83059
NUDT4	-4.02313	-7.09797	-2.32921
OPRK1	-3.27497	-63.9253	-5.52668
PACSIN3	-3.39229	-8.41391	-6.05489
PARP6	-3.65257	-2.4309	-4.12785
PCCA	-2.42272	-4.00795	-2.51827
PDIA5	-2.68782	-4.94449	-6.40256
PEBP4	-2.30534	-9.27406	-59.5283
PKNOX2	-2.06419	-13.4084	-16.4493
PKP1	-2.15077	-10.0112	-12.7107
PLA2G4F	-2.09721	-4.17956	-15.4931
POLB	-2.72828	-5.83324	-2.24973
POLD4	-2.0859	-3.45613	-2.00157
PPFIBP1	-3.20698	-6.56512	-2.17946
PPM1H	-2.92034	-119.739	-5.45832
PSCA	-6.89028	-98.4522	-2.40578
PTGS2	-8.2896	-3.40541	-13.4481
PVT1	-4.36628	-3.75578	-6.63843
RAB27A	-4.94519	-5.35109	-4.07431
RBPMS2	-2.55268	-8.92861	-4.03883
REPS2	-2.80872	-3.01055	-12.5827
RFPL1	-6.15988	-3.93517	-6.33505
RFPL2	-10.6127	-3.12694	-20.4669
RFX6	-2.25377	-9.35148	-2.754
RGS10	-2.1043	-9.70186	-8.21903
RHOU	-3.62227	-139.779	-4.83019
RIPK2	-2.51021	-3.82142	-2.75055
RNF41	-2.1221	-2.15389	-2.49985
RORC	-2.11489	-527.459	-4.66717
RRAS	-2.80586	-2.59839	-2.22149
RRAS2	-2.14275	-3.35758	-3.70928
SAMD13	-9.40998	-2.69722	-2.29484
SC5DL	-2.51908	-2.68193	-5.26706
SEC14L2	-2.06014	-8.18111	-4.66364
SEL1L	-3.0094	-2.23024	-4.47057
SERP1	-2.253	-2.8991	-2.4998
SERP2	-14.1433	-23.4807	-2.93542
SETD7	-2.68935	-3.86859	-2.32634
SI	-6.18453	-11.3629	-2.38135
SIDT1	-16.7744	-5.7718	-8.01382
SIM2	-2.46376	-27.2705	-8.5842
SLC16A9	-2.61044	-5.21112	-4.5182
SLC22A5	-2.58865	-2.20897	-2.36762
SLC26A3	-3.98112	-2.18487	-2.69413
SLC26A4	-12.9063	-14.2314	-51.3827
SLC39A6	-3.82433	-4.89201	-3.03876
SLC39A8	-3.14113	-13.4717	-3.72381
SLC43A1	-2.05715	-7.7963	-2.82721
SLCO2A1	-5.45039	-2.00193	-2.74518
SNHG8	-2.82453	-2.19911	-3.67888
SNORA74A	-2.0386	-6.34485	-4.58109
SPATA13	-2.92004	-6.27395	-3.45712
ST6GALNAC1	-4.83894	-14.4093	-25.6414
STAT6	-3.82016	-22.5426	-3.98893
STON1	-2.48099	-4.22782	-4.07866
STON1-GTF2A1L	-27.2749	-2.17418	-4.07824
STX19	-6.22389	-11.5232	-2.24585
STXBP6	-2.27602	-3.95691	-2.17484
SULT2B1	-3.87892	-16.942	-2.43982
TACC2	-2.21159	-5.58096	-4.8876
TACSTD2	-2.19766	-65.6896	-14.5879
TANC1	-2.40993	-3.97732	-2.85824
TGM3	-7.45259	-2.45585	-3.18137
THRB	-5.89528	-11.4839	-8.76069
TMCC3	-2.08842	-2.29005	-3.483
TMEFF2	-4.82603	-77.262	-237.408
TMEM117	-2.66626	-43.6347	-2.43848
TMEM133	-4.0597	-9.4022	-2.92378
TMEM144	-2.97299	-30.1835	-7.08161
TMEM87A	-2.41057	-2.36642	-3.58598
TNFAIP3	-3.09784	-8.11688	-2.74397
TPD52L1	-2.08496	-36.4433	-4.38569
TRPS1	-3.7664	-13.7433	-2.85163
TSPAN33	-2.4871	-3.09127	-3.03858
TXK	-2.09223	-3.68045	-4.84108
WWP1	-2.20756	-3.18978	-2.63278
ZC3H12A	-2.21561	-6.82863	-3.82701
ZCCHC6	-4.60315	-2.12996	-6.55611
ZNF532	-2.4231	-11.6853	-2.20149
